# Supplementary material for: Spatial heterogeneity of the cytosol revealed by machine learning-based 3D particle tracking
Source: PubMed Central journal article supplement — Mol Biol Cell. 2020 Jul 1;31(14):1498–511. doi: 10.1091/mbc.E20-03-0210 (PMC7359570; doi:10.1091/mbc.e20-03-0210), 2020-07-01
Supplement: mbc-31-1498-s001.pdf [file mbc-31-1498-s001.pdf]

# Supplemental Materials

*Molecular Biology of the Cell*

McLaughlin et al.

### Supplemental Video 1

Max projection of GEMs in an Ashbya cell. 3D GEM localizations are visualized as green spheres above the max projection, and surface projected diffusivity estimates are shown above those.

### Supplemental Video 2

Max projection, localizations, and surface projected diffusivity estimates for a single hypha. Lower diffusivity at the hyphal tip as well as heterogeneity of diffusivity within the hypha can be seen.

### Supplemental Video 3

An example of a testing video as described in Figure 3A. Max projection of simulated Brownian motion shown, with localizations as green spheres, and surface projected diffusivity estimates above.
